# Supplementary material for: Leveraging group model building to operationalize implementation strategies across implementation phases: an exemplar related to child maltreatment intervention selection
Source: PubMed Central journal article supplement — Implement Sci Commun. 2024 Dec 2;5:134. doi: 10.1186/s43058-024-00660-2 (PMC11610114; doi:10.1186/s43058-024-00660-2), 2024-12-02
Supplement: 43058_2024_660_MOESM6_ESM.pdf [file 43058_2024_660_MOESM6_ESM.pdf]

**Additional File 7: Characteristics of Evidence Based Prevention Programs Presented for Program Selection**

| <b>Topic/Concept</b>                           | <b>Definition</b>                                                                                                     |
|------------------------------------------------|-----------------------------------------------------------------------------------------------------------------------|
| Intervention Name                              | As designated by program developers                                                                                   |
| Type of Prevention                             | Qualitative description of prevention program targeted population and outcomes                                        |
| Child age range targeted                       | Child age for inclusion                                                                                               |
| Parent outcomes targeted                       | Final or interim (mediating) parent-level targets of parental intervention                                            |
| Child outcomes targeted                        | Final or interim (mediating) child-level targets of parental intervention                                             |
| Session Description                            | Including session length, modality (individual, group) and number of sessions.                                        |
| Timeframe for Delivery                         | Time frame over which intervention is delivered (length and point of engagement)                                      |
| Level of Evidence                              | Strength of evidence as designated by evidence-based registry                                                         |
| Testing site                                   | Location(s) where intervention effectiveness and implementation trials conducted                                      |
| Implementation Setting                         | Location where intervention is delivered                                                                              |
| Intervention Deliverers                        | Practitioner responsible for delivering intervention and associated professional or education degrees                 |
| Benefits minus cost, per participant, per year | Drawn from Washington State Institute for Public Policy (WSIPP)                                                       |
| Chances benefits will exceed costs             | Drawn from Washington State Institute for Public Policy (WSIPP) based on simulation experiments of assumed parameters |
| Available languages other than English         | Languages that program is offered in other than English                                                               |
| Pre-implementation training or assessment      | Yes/No, based on program registry                                                                                     |
| Manual available                               | Yes/No, based on program registry                                                                                     |
| Source                                         | Evidence-based registry from which information drawn                                                                  |
