# Supplementary material for: Leveraging group model building to operationalize implementation strategies across implementation phases: an exemplar related to child maltreatment intervention selection
Source: PubMed Central journal article supplement — Implement Sci Commun. 2024 Dec 2;5:134. doi: 10.1186/s43058-024-00660-2 (PMC11610114; doi:10.1186/s43058-024-00660-2), 2024-12-02
Supplement: 43058_2024_660_MOESM7_ESM.pdf [file 43058_2024_660_MOESM7_ESM.pdf]

## Additional File 7: Recommendations for Reporting Group Model Building Projects and Core Components

| Construct (1)                            | Sub-Construct (1) | Characteristics to be reported (1)                                                                                                                                                                                                                                     | Exemplar constructs to add, proposed adaptations to Rouwette et al. (2002) based on implementation science frameworks, literature                                                                                                                                                                                                                                                                                                                                                                                                                                                                                                                                                       |
|------------------------------------------|-------------------|------------------------------------------------------------------------------------------------------------------------------------------------------------------------------------------------------------------------------------------------------------------------|-----------------------------------------------------------------------------------------------------------------------------------------------------------------------------------------------------------------------------------------------------------------------------------------------------------------------------------------------------------------------------------------------------------------------------------------------------------------------------------------------------------------------------------------------------------------------------------------------------------------------------------------------------------------------------------------|
| <b>Context</b>                           |                   |                                                                                                                                                                                                                                                                        |                                                                                                                                                                                                                                                                                                                                                                                                                                                                                                                                                                                                                                                                                         |
| Geography                                |                   | <ul style="list-style-type: none"> <li>- Continent</li> <li>- Country</li> <li>- State</li> <li>- City</li> </ul>                                                                                                                                                      | <ul style="list-style-type: none"> <li>- Rurality</li> <li>- Physical environment/landscape/resources (2)</li> <li>- Transportation infrastructure (2,3)</li> <li>- Environmental pollution</li> <li>- Community</li> </ul>                                                                                                                                                                                                                                                                                                                                                                                                                                                             |
| Organization Characteristics             |                   |                                                                                                                                                                                                                                                                        | <p><i>Note:</i> When multiple organizations involved, as is common in implementation efforts, reporting should include each organization involved. Depending on the implementation effort, reporting at the level of the community or service system (e.g., child welfare, hospital) may also be appropriate, in addition to organizations or instead of the organizational unit. When reporting on community or service system characteristics, organization characteristics may not be appropriately aligned and may require tailoring (e.g., staffing processes may be tailored to “community partner recruitment process”). Other constructs, such as culture, may still apply.</p> |
| Organization Characteristics (continued) | Structure         | <ul style="list-style-type: none"> <li>- Functional</li> <li>- Team-based</li> <li>- Network</li> </ul>                                                                                                                                                                | <ul style="list-style-type: none"> <li>- Personnel hierarchy (e.g., leadership, middle management, team leaders, service providers) (4,5)</li> <li>- Inter-organizational networks (4,5)</li> <li>- Intra-organizational networks (relational connections) (5,6)</li> <li>- Physical Infrastructure (6)</li> <li>- Information technology infrastructure (6)</li> <li>- Work infrastructure (6)</li> </ul>                                                                                                                                                                                                                                                                              |
|                                          | Type              | <ul style="list-style-type: none"> <li>- Profit (production, services, distribution)</li> <li>- Non-profit (e.g., teaching)</li> <li>- Governmental level (national, state, county, city)</li> <li>- Governmental type (defense, finance, economic affairs)</li> </ul> | <ul style="list-style-type: none"> <li>- Non-profit (e.g., advocacy)</li> </ul>                                                                                                                                                                                                                                                                                                                                                                                                                                                                                                                                                                                                         |
|                                          | Size              | <ul style="list-style-type: none"> <li>- Number of people employed</li> <li>- Estimated (financial) returns</li> </ul>                                                                                                                                                 |                                                                                                                                                                                                                                                                                                                                                                                                                                                                                                                                                                                                                                                                                         |
|                                          | <i>Processes</i>  |                                                                                                                                                                                                                                                                        | <ul style="list-style-type: none"> <li>- Staffing processes (5)</li> <li>- Policies and procedures (4,5)</li> <li>- Funding/Contracting (4,5)</li> <li>- Fidelity monitoring (4,5)</li> <li>- Communications (6)</li> </ul>                                                                                                                                                                                                                                                                                                                                                                                                                                                             |

|                                                                                      |            |                                                                                                                                                                                                                                                                                                                                                  |                                                                                                                                                                                                                                                                                                                                                                                                                              |
|--------------------------------------------------------------------------------------|------------|--------------------------------------------------------------------------------------------------------------------------------------------------------------------------------------------------------------------------------------------------------------------------------------------------------------------------------------------------|------------------------------------------------------------------------------------------------------------------------------------------------------------------------------------------------------------------------------------------------------------------------------------------------------------------------------------------------------------------------------------------------------------------------------|
| <i>Culture<sup>+</sup></i>                                                           |            |                                                                                                                                                                                                                                                                                                                                                  | <ul style="list-style-type: none"> <li>- Attitudes towards evidence-based practices (7,8)</li> <li>- Tension for change (6)</li> <li>- Leadership (5,8,9)</li> <li>- Climate (7,8)</li> <li>- Local attitudes, sociocultural values, beliefs (2,4,6)</li> <li>- Human Equality-Centeredness (6)</li> <li>- Recipient-Centeredness (6)</li> <li>- Deliverer-Centeredness (6)</li> <li>- Learning- Centeredness (6)</li> </ul> |
| <i>Outer Context</i>                                                                 |            |                                                                                                                                                                                                                                                                                                                                                  |                                                                                                                                                                                                                                                                                                                                                                                                                              |
|                                                                                      |            |                                                                                                                                                                                                                                                                                                                                                  | <ul style="list-style-type: none"> <li>- Critical Incidents (3,6)</li> <li>- Partnerships and Connections (including community members, other organizations, knowledge brokers) (6,10–12)</li> <li>- Policies and laws (2,3,13,14)</li> <li>- Financing (6,15)</li> <li>- External Pressure (3,6)</li> <li>- Ethical (2)</li> <li>- Legal (2)</li> <li>- Socio-economic (2)</li> <li>- Epidemiological (2)</li> </ul>        |
| <i>Inner Context relative to implementation and/or delivery of an innovation (6)</i> |            |                                                                                                                                                                                                                                                                                                                                                  | <ul style="list-style-type: none"> <li>- Compatibility</li> <li>- Relative Priority</li> <li>- Incentive Systems</li> <li>- Available Resources</li> </ul>                                                                                                                                                                                                                                                                   |
| <i>Problem</i>                                                                       |            |                                                                                                                                                                                                                                                                                                                                                  |                                                                                                                                                                                                                                                                                                                                                                                                                              |
|                                                                                      | Analytical | <ul style="list-style-type: none"> <li>- Situation uniqueness</li> <li>- Consequentiality (severity, duration of problem impacts)</li> <li>- Precursiveness (impact on subsequent decisions)</li> <li>- Number and diversity of interests involved</li> <li>- Openness to alternatives (whether decisions already made and finalized)</li> </ul> | <ul style="list-style-type: none"> <li>- Openness to alternatives: Opportunities for first-time or revisited decisions (16–18)</li> </ul>                                                                                                                                                                                                                                                                                    |
|                                                                                      | Social     | <ul style="list-style-type: none"> <li>- Degree/Pressure of influence</li> <li>- External Pressure</li> <li>- Imbalance of pressure between different sources</li> </ul>                                                                                                                                                                         | <ul style="list-style-type: none"> <li>- Inter-organizational networks (4,5)</li> <li>- External Pressure: <ul style="list-style-type: none"> <li>- Influence of other implementing sites (6)</li> <li>- Market (6)</li> <li>- Performance (3,6)</li> </ul> </li> <li>- Political (2,3)</li> </ul>                                                                                                                           |

|  |  |                                                                                                          |  |
|--|--|----------------------------------------------------------------------------------------------------------|--|
|  |  | - Contention of objectives (whether sources of influence attempting to influence in opposite directions) |  |
|--|--|----------------------------------------------------------------------------------------------------------|--|

| <b>Mechanisms</b>                                                                                                          |                                           |                                                                                                                                                                             |                                                                                                                                                                                                                                                                                                                                                             |
|----------------------------------------------------------------------------------------------------------------------------|-------------------------------------------|-----------------------------------------------------------------------------------------------------------------------------------------------------------------------------|-------------------------------------------------------------------------------------------------------------------------------------------------------------------------------------------------------------------------------------------------------------------------------------------------------------------------------------------------------------|
| <b>“process of the intervention itself” (1)</b>                                                                            |                                           |                                                                                                                                                                             |                                                                                                                                                                                                                                                                                                                                                             |
| <b>“process or event through which an implementation strategy operates to affect desired implementation outcomes” (19)</b> |                                           |                                                                                                                                                                             |                                                                                                                                                                                                                                                                                                                                                             |
| <b>Activities that “must be tracked to link the elements and processes to outcomes”</b>                                    |                                           |                                                                                                                                                                             |                                                                                                                                                                                                                                                                                                                                                             |
| <b>Pre-Project (<i>Preparation</i>)</b>                                                                                    |                                           |                                                                                                                                                                             |                                                                                                                                                                                                                                                                                                                                                             |
|                                                                                                                            | Initiation of Contact                     | - Modeling team or client organization                                                                                                                                      | - Researchers, community members, or funders                                                                                                                                                                                                                                                                                                                |
|                                                                                                                            | Expectations and goals of project         | - Client’s initial expectations<br>- Project goals (more insight, make decision, implement results, testing proposed strategies/policies)<br>- Top management support level | - Project or policy vision (14,20)<br>- Leadership buy-in (9,21)<br>- Resource allocation (6,22)<br>- Hybrid (23)                                                                                                                                                                                                                                           |
|                                                                                                                            | Research/Modeling question type           | - Exploratory<br>- Explanatory<br>- Descriptive<br>- Prescriptive                                                                                                           | - Effectiveness (24)<br>- Implementation (25)<br>- Implementation Process (e.g., planning, tailoring strategies, adapting) (6,18,26)<br>- Hybrid 10/29/24 7:21:00 AM<br>- Innovation- specific: (6)<br>- Evidence base<br>- Relative advantage<br>- Adaptability<br>- Complexity<br>- Cost (6,28)                                                           |
|                                                                                                                            | Participating Management Team Composition | - Who/how team composition selected (client, consultant, both)<br>- Size<br>- Composition and heterogeneity of team (characteristics, roles)<br>- Official gatekeeper       | - Community/organization-academic partnerships (4,5)<br>- Diversity with respect to demographics (e.g., race, ethnicity, age, experience), social and/or organizational/system power, professional or community-based roles (6,29,30)<br>- Innovation adopter (e.g., clinicians, practitioners) characteristics (4,5)<br>- Implementation champions (31,32) |
|                                                                                                                            | Modeling team                             | - Size<br>- Roles (facilitator, recorder, content coach, process coach)                                                                                                     | - Training<br>- Role in community-academic partnership<br>- Experience                                                                                                                                                                                                                                                                                      |
| <b>Model-building meetings (Sessions)</b>                                                                                  |                                           |                                                                                                                                                                             |                                                                                                                                                                                                                                                                                                                                                             |
|                                                                                                                            | Meetings and time investment              | - Number of meetings and average duration<br>- Total time invested by participants                                                                                          | - Time invested by modeling and facilitation team for preparation<br>- Time elapsed between modeling sessions<br>- Participant attrition                                                                                                                                                                                                                    |

|                                                 |                                                                                                                                                                                                                                                                                                                                                                 |                                                                                                                                                                                                                                                                                                                                                                                                                                                                                                                                                                                                                                                              |
|-------------------------------------------------|-----------------------------------------------------------------------------------------------------------------------------------------------------------------------------------------------------------------------------------------------------------------------------------------------------------------------------------------------------------------|--------------------------------------------------------------------------------------------------------------------------------------------------------------------------------------------------------------------------------------------------------------------------------------------------------------------------------------------------------------------------------------------------------------------------------------------------------------------------------------------------------------------------------------------------------------------------------------------------------------------------------------------------------------|
| <i>Meetings and time investment (continued)</i> | <ul style="list-style-type: none"> <li>- Total time invested by modelers</li> <li>- Total time span of modeling project (initial contact to project close)</li> <li>- Stages of model building that involved participants; extent of participation (marginal → fully)</li> <li>- Extent and type of modeling work done with and without participants</li> </ul> | <ul style="list-style-type: none"> <li>- Implementation phase(s) during which modeling conducted</li> <li>- Implementation phase(s) for which modeling intended to support/target</li> </ul>                                                                                                                                                                                                                                                                                                                                                                                                                                                                 |
| <b>Model and modeling procedure</b>             |                                                                                                                                                                                                                                                                                                                                                                 |                                                                                                                                                                                                                                                                                                                                                                                                                                                                                                                                                                                                                                                              |
| Introduction to system dynamics:                | <ul style="list-style-type: none"> <li>- Type of introduction to system dynamics given</li> <li>- Whether “management flight simulators” used to introduce system dynamics thinking</li> </ul>                                                                                                                                                                  | <ul style="list-style-type: none"> <li>- Whether health-related or non-health related simulations used to introduce system dynamics thinking</li> <li>- When in project introduction given</li> <li>- System dynamics concepts reviewed</li> <li>- References shared</li> <li>- Modality of introduction (e.g., didactic, lecture)</li> </ul>                                                                                                                                                                                                                                                                                                                |
| Modeling Process:                               | <ul style="list-style-type: none"> <li>- Type and process of modeling (flow diagrams, causal loop diagrams, quantitative modeling, simulation)</li> <li>- How policies (e.g., potential real-world interventions) assessed</li> <li>- Modeling software used</li> </ul>                                                                                         | <ul style="list-style-type: none"> <li>- Scripts or other research activities conducted with participants to check structural and face validity (1,33,34)</li> </ul>                                                                                                                                                                                                                                                                                                                                                                                                                                                                                         |
| Model:                                          | <ul style="list-style-type: none"> <li>- Size</li> <li>- Dynamic complexity (number of feedback loops)</li> </ul>                                                                                                                                                                                                                                               | <ul style="list-style-type: none"> <li>- Size (35): <ul style="list-style-type: none"> <li>- Computer file size</li> <li>- Number of stocks, flows</li> <li>- Key feedback loop(s): variables, stories</li> <li>- Model boundary</li> <li>- Number of variables</li> </ul> </li> <li>- Implementation: <ul style="list-style-type: none"> <li>- Actors (25,36)</li> <li>- Actions/ interventions/strategies (36,37)</li> <li>- Targets (19,25,36)</li> <li>- Context (36,38,39)</li> <li>- Time (35,36)</li> </ul> </li> <li>- Innovation(s) modeled</li> <li>- Assumptions (35)</li> <li>- Implementation theory, model, or framework (25,40,41)</li> </ul> |
| <b>Elicitation of Mental Models</b>             |                                                                                                                                                                                                                                                                                                                                                                 |                                                                                                                                                                                                                                                                                                                                                                                                                                                                                                                                                                                                                                                              |
| Sources of information                          | <ul style="list-style-type: none"> <li>- Sources besides participants’ mental models</li> </ul>                                                                                                                                                                                                                                                                 | <ul style="list-style-type: none"> <li>- Secondary documents (e.g., contracts, bills, laws, meeting minutes, reports)</li> </ul>                                                                                                                                                                                                                                                                                                                                                                                                                                                                                                                             |
| Process of eliciting                            | <ul style="list-style-type: none"> <li>- Pre-meeting interviews</li> </ul>                                                                                                                                                                                                                                                                                      | <ul style="list-style-type: none"> <li>- Whether scripts tailored, adapted, or new</li> </ul>                                                                                                                                                                                                                                                                                                                                                                                                                                                                                                                                                                |

|                            |                              |                                                                                                                                                                                                                                                                                          |                                                                                                                                                                                                                                                                                                                                                                                                                                        |
|----------------------------|------------------------------|------------------------------------------------------------------------------------------------------------------------------------------------------------------------------------------------------------------------------------------------------------------------------------------|----------------------------------------------------------------------------------------------------------------------------------------------------------------------------------------------------------------------------------------------------------------------------------------------------------------------------------------------------------------------------------------------------------------------------------------|
|                            | knowledge from participants  | <ul style="list-style-type: none"> <li>- Preliminary model or model built from scratch</li> <li>- Specific group processes used? (e.g., nominal group technique, Delphi)</li> <li>- Specific scripts (e.g., feedback elicitation)</li> <li>- Questionnaires or workbooks used</li> </ul> |                                                                                                                                                                                                                                                                                                                                                                                                                                        |
|                            | Facilitation                 | <ul style="list-style-type: none"> <li>- Degree of facilitators' neutrality (e.g., positionality)</li> <li>- Degree to which participants perceived facilitator as skilled</li> </ul>                                                                                                    | <ul style="list-style-type: none"> <li>- Satisfaction with facilitators</li> <li>- Effectiveness of facilitators (42)</li> </ul>                                                                                                                                                                                                                                                                                                       |
| <b>Practical processes</b> |                              |                                                                                                                                                                                                                                                                                          |                                                                                                                                                                                                                                                                                                                                                                                                                                        |
|                            | Logistics                    | <ul style="list-style-type: none"> <li>- Where meetings held (in or away from organization)</li> <li>- Room design, layout</li> <li>- Materials (whiteboard, computer)</li> </ul>                                                                                                        | <ul style="list-style-type: none"> <li>- Where meetings held: <ul style="list-style-type: none"> <li>- Physical location</li> <li>- Virtual, in-person</li> </ul> </li> <li>- Materials: paper, sticky notes, software (e.g., modeling)</li> </ul>                                                                                                                                                                                     |
| <b>Follow-up</b>           |                              |                                                                                                                                                                                                                                                                                          |                                                                                                                                                                                                                                                                                                                                                                                                                                        |
|                            | Official Report              | <ul style="list-style-type: none"> <li>- Whether given</li> </ul>                                                                                                                                                                                                                        | <ul style="list-style-type: none"> <li>- Report characteristics (43): <ul style="list-style-type: none"> <li>- Information within</li> <li>- Dissemination method(s) and format (e.g., presentation, PDF)</li> <li>- Who has access</li> </ul> </li> </ul>                                                                                                                                                                             |
|                            | Other                        |                                                                                                                                                                                                                                                                                          |                                                                                                                                                                                                                                                                                                                                                                                                                                        |
|                            | <i>Dissemination efforts</i> |                                                                                                                                                                                                                                                                                          | <ul style="list-style-type: none"> <li>- Focal audience(s) (43,44)</li> <li>- Format/Product (e.g., social media post, website)</li> <li>- Modality (e.g., virtual, in-person, web-based)</li> <li>- Frequency of release (e.g., one-time, quarterly)</li> <li>- Benefits reported (clinical, community, economic, policy) (43)</li> <li>- Purpose (e.g., educate, shape policy design or implementation, persuade) (43,45)</li> </ul> |
| <b>Outcomes</b>            |                              |                                                                                                                                                                                                                                                                                          |                                                                                                                                                                                                                                                                                                                                                                                                                                        |
|                            | Sample (data source)         | <ul style="list-style-type: none"> <li>- Modeling team</li> <li>- participants</li> </ul>                                                                                                                                                                                                | <ul style="list-style-type: none"> <li>- Innovation recipients</li> <li>- Implementers</li> <li>- Leadership/Middle managers</li> </ul>                                                                                                                                                                                                                                                                                                |
|                            | Data Collection Methods      | <ul style="list-style-type: none"> <li>- Interviews</li> <li>- questionnaires</li> <li>- (in)formal observations</li> </ul>                                                                                                                                                              | <ul style="list-style-type: none"> <li>- Questionnaires: <ul style="list-style-type: none"> <li>- Qualitative</li> <li>- Quantitative</li> <li>- Mixed-methods</li> </ul> </li> <li>- Secondary data (e.g., administrative)</li> <li>- Mobile (or other technology-based) (46)</li> <li>- Focus groups</li> </ul>                                                                                                                      |

|                     |                                                                                                                                                                                              |                                                                                                                                                                                                                                                                                                                                              |
|---------------------|----------------------------------------------------------------------------------------------------------------------------------------------------------------------------------------------|----------------------------------------------------------------------------------------------------------------------------------------------------------------------------------------------------------------------------------------------------------------------------------------------------------------------------------------------|
| Assessment Timing   | <i>e.g.</i> , Pre, Post, during                                                                                                                                                              | During: <ul style="list-style-type: none"> <li>- Modeling sessions</li> <li>- Course of modeling project</li> </ul>                                                                                                                                                                                                                          |
| Variables collected | <ul style="list-style-type: none"> <li>- Distal outcomes (shifts in participants' perceptions of problem, system changes)</li> <li>- Process variables (participant satisfaction)</li> </ul> | <ul style="list-style-type: none"> <li>- Anticipated Implementation (6)</li> <li>- Actual Implementation (25,47)</li> <li>- Process variables: <ul style="list-style-type: none"> <li>- Acceptability of modeling project elements (e.g., scripts)</li> <li>- Decision quality</li> <li>- Decision experience quality</li> </ul> </li> </ul> |
| Variable Types      | <ul style="list-style-type: none"> <li>- Individual</li> <li>- Group</li> <li>- Organization</li> <li>- Method</li> </ul>                                                                    | <ul style="list-style-type: none"> <li>- Implementation (25,47)</li> <li>- Innovations adopted and considered (25,47)</li> <li>- Service (25)</li> <li>- Client Outcomes (25)</li> <li>- Policy (13,14)</li> </ul>                                                                                                                           |

+ recommended but not required as part of Rouwette et al (2002) basic reporting guidelines due to measurement burden on modeling team and participants

Note: Information in the first three columns was taken verbatim from Rouwette et al. (2002) or slightly altered for brevity or consistency; Italicized text and column four (furthest right) were added by current authors.

## References Cited

1. Rouwette EAJA, Vennix JAM, Mullekom T van. Group model building effectiveness: a review of assessment studies. *System Dynamics Review*. 2002;18(1):5–45.
2. Pfadenhauer LM, Gerhardus A, Mozygemba K, Lysdahl KB, Booth A, Hofmann B, Wahlster P, Polus S, Burns J, Brereton L, Rehfuss E. Making sense of complexity in context and implementation: the Context and Implementation of Complex Interventions (CICI) framework. *Implementation Science*. 2017 Dec;12:1-7.
3. Cruden G, Schaper H, Wong D, Crawford S, Saldana L. "Illuminating the Impacts of Outer Context on Implementation. Oral Presentation. Academy Health 15<sup>th</sup> Annual Conference on Dissemination and Implementation Science." 2022; Washington D.C.; December 11-14.
4. Aarons GA., Hurlburt M, Horwitz SM. Advancing a conceptual model of evidence-based practice implementation in public service sectors. *Administration and Policy in Mental Health and Mental Health Services Research*. 2011;38(1):4–23.
5. Moullin JC, Dickson KS, Stadnick NA, Rabin B, Aarons GA. Systematic review of the exploration, preparation, implementation, sustainment (EPIS) framework. *Implementation Science*. 2019;14(1):1–1.
6. Damschroder LJ, Reardon CM, Widerquist MAO, Lowery J. The updated Consolidated Framework for Implementation Research based on user feedback. *Implementation Science*. 2022 Oct 29;17(1):75.
7. Aarons GA, Sawitzky AC. Organizational Culture and Climate and Mental Health Provider Attitudes Toward Evidence-Based Practice. *Psychological services*. 2006 Feb;3(1):61–72.
8. Aarons GA, Sommerfeld DH. Leadership, Innovation Climate, and Attitudes toward Evidence-Based Practice during a Statewide Implementation. *Journal of the American Academy of Child and Adolescent Psychiatry*. 2012;51(4):423–31.
9. Aarons GA, Ehrhart MG, Farahnak LR, Hurlburt MS. Leadership and Organizational Change for Implementation (LOCI): A randomized mixed method pilot study of a leadership and organization development intervention for evidence-based practice implementation. *Implementation Science*. 2015;10(11).
10. Combs T, Nelson KL, Luke D, McGuire FH, Cruden G, Henson RM, et al. Simulating the role of knowledge brokers in policy making in state agencies: An agent-based model. *Health Services Research [Internet]*. 2022 Jun;57:122-36. Available from: <https://doi.org/10.1111/1475-6773.13916>
11. Brown CH, Kellam SG, Kaupert S, Muthén BO, Wang W, Muthén L, et al. Partnerships for the Design, Conduct, and Analysis of Effectiveness, and Implementation Research: Experiences of the Prevention Science and Methodology Group. *Administration and Policy in Mental Health*. 2012;39(4):301–16.

12. Gopalan G, Kerns SEU, Horen MJ, Lowe J. Partnering for Success: Factors Impacting Implementation of a Cross-Systems Collaborative model Between Behavioral Health and Child Welfare. *Administration and Policy in Mental Health and Mental Health Services Research*. 2021;1–18.
13. Crable EL, Lengnick-Hall R, Stadnick NA, Moullin JC, Aarons GA. Where is “policy” in dissemination and implementation science? Recommendations to advance theories, models, and frameworks: EPIS as a case example. *Implementation Science*. 2022 Dec 12;17(1):80.
14. Bullock HL, Lavis JN, Wilson MG, Mulvale G, Miatello A. Understanding the implementation of evidence-informed policies and practices from a policy perspective: a critical interpretive synthesis. *Implementation Science*. 2021;16(1):18–18.
15. Dopp AR, Kerns SEU, Panattoni L, Ringel JS, Eisenberg D, Powell BJ, et al. Translating economic evaluations into financing strategies for implementing evidence-based practices. *Implementation Science*. 2021;16(1):66–66.
16. Cruden G, Frerichs L, Powell BJ, Lanier P, Brown CH, Lich KH. Developing a Multi-Criteria Decision Analysis Tool to Support the Adoption of Evidence-Based Child Maltreatment Prevention Programs. *Prevention Science*. 2020;21(8):1059–64.
17. Sheldrick RC, Cruden G, Schaefer AJ, Mackie TI. Rapid cycle systems modeling to support evidence-informed decision-making during system-wide implementation. *Implementation Science Communications*. 2021; Dec;2:1-4.
18. Vermeer WH, Smith JD, Wilensky U, Brown CH. High-Fidelity Agent-Based Modeling to Support Prevention Decision-Making: an Open Science Approach. *Prevention Science*. 2021;1–12.
19. Lewis CC, Klasnja P, Powell BJ, Lyon AR, Tuzzio L, Jones S, et al. From Classification to Causality: Advancing Understanding of Mechanisms of Change in Implementation Science. *Frontiers in Public Health*. 2018 May;6:136–136.
20. Kolehmainen N, MacLennan G, Ternent L, Duncan EA, Duncan EM, Ryan SB, et al. Using shared goal setting to improve access and equity: a mixed methods study of the Good Goals intervention in children’s occupational therapy. *Implementation Science*. 2012 Dec [cited 2017 Sep 7];7(1).
21. Aarons GA, Green AE, Trott E, Willging CE, Torres EM, Ehrhart MG, et al. The Roles of System and Organizational Leadership in System-Wide Evidence-Based Intervention Sustainment: A Mixed-Method Study. *Administration and Policy in Mental Health and Mental Health Services Research*. 2016;43(6).
22. Saldana L, Chamberlain P, Bradford WD, Campbell M, Landsverk J. The cost of implementing new strategies (COINS): A method for mapping implementation resources using the Stages of Implementation Completion. *Children Youth Services Review*. 2014;39:177–82.
23. Curran GM, Landes SJ, McBain SA, Pyne JM, Smith JD, Fernandez ME, et al. Reflections on 10 years of effectiveness-implementation hybrid studies. *Frontiers in Health Services* [Internet]. 2022;2. Available from: <https://www.frontiersin.org/articles/10.3389/frhs.2022.1053496>



24. Brown CH, Curran G, Palinkas LA, Aarons GA, Wells KB, Jones L, et al. An Overview of Research and Evaluation Designs for Dissemination and Implementation. *Annual Review of Public Health*. 2017 Mar;38(1):1–22.
25. Proctor E, Silmere H, Raghavan R, Hovmand P, Aarons G, Bunger A, et al. Outcomes for Implementation Research: Conceptual Distinctions, Measurement Challenges, and Research Agenda. *Administration and Policy in Mental Health and Mental Health Services Research*. 2011 Mar;38(2):65–76.
26. Saldana L. The stages of implementation completion for evidence-based practice: protocol for a mixed methods study. *Implementation Science*. 2014;9(1):43–43.
27. Kemp CG, Wagenaar BH, Haroz EE. Expanding Hybrid Studies for Implementation Research: Intervention, Implementation Strategy, and Context. *Frontiers in Public Health*. 2019 Nov;7:325–325.
28. Kilmer B, Eibner C, Ringel JS, Pacula RL. Invisible Wounds, Visible Savings? Using Microsimulation to Estimate the Costs and Savings Associated With Providing Evidence-Based Treatment for PTSD and Depression to Veterans of Operation Enduring Freedom and Operation Iraqi Freedom. *Psychological Trauma: Theory, Research, Practice, and Policy*. 2011.
29. Woodward EN, Matthieu MM, Uchendu US, Rogal S, Kirchner JE. The health equity implementation framework: proposal and preliminary study of hepatitis C virus treatment. *Implementation Science [Internet]*. 2019 Dec [cited 2019 Mar 15];14(1). Available from: <https://implementationscience.biomedcentral.com/articles/10.1186/s13012-019-0861-y>
30. Sanchez AL, Cliggitt LP, Dallard NL, Irby D, Harper M, Schaffer E, et al. Power redistribution and upending white supremacy in implementation research and practice in community mental health. *Psychiatric services*. 2023;appi-ps.
31. Kirchner JE, Parker LE, Bonner LM, Fickel JJ, Yano EM, Ritchie MJ. Roles of managers, frontline staff and local champions, in implementing quality improvement: stakeholders' perspectives: Stakeholder perspectives on implementing QI. *Journal of Evaluation in Clinical Practice*. 2012 Feb;18(1):63–9.
32. Shaw EK, Howard J, West DR, Crabtree BF, Nease DE, Tutt B, et al. The role of the champion in primary care change efforts: from the State Networks of Colorado Ambulatory Practices and Partners (SNOCAP). *The Journal of the American Board of Family Medicine*. 2012;25(5):676–85.
33. Sterman JD. *Business dynamics: systems thinking and modeling for a complex world*. New York, NY: McGraw-Hill; 2000.
34. Andersen DF, Richardson GP, Vennix JAM. Group model building: adding more science to the craft. *System Dynamics Review: The Journal of the System Dynamics Society*. 1997;13(2):187–201.

35. Rahmandad H, Sterman JD. Reporting guidelines for simulation-based research in social sciences. *System Dynamics Review*. 2012;28(4):396–411.
36. Presseau J, McCleary N, Lorencatto F, Patey AM, Grimshaw JM, Francis JJ. Action, actor, context, target, time (AACTT): a framework for specifying behaviour. *Implementation Science*. 2019;14:1–13.
37. Powell BJ, Waltz TJ, Chinman MJ, Damschroder LJ, Smith JL, Matthieu MM, et al. A refined compilation of implementation strategies: results from the Expert Recommendations for Implementing Change (ERIC) project. *Implementation Science*. 2015;10(1):21–21.
38. Nilsen P, Bernhardsson S. Context matters in implementation science: a scoping review of determinant frameworks that describe contextual determinants for implementation outcomes. *BMC health services research*. 2019;19(1):189–189.
39. Luke DA. Getting the big picture in community science: Methods that capture context. *American journal of community psychology*. 2005;35(3–4):185–185.
40. Damschroder LJ. Clarity out of chaos: Use of theory in implementation research. *Psychiatry Research*. 2020 Jan;283:112461–112461.
41. Nilsen P. Making sense of implementation theories, models, and frameworks. *Implementation Science*. 2015;10(1):53–53.
42. Zimmerman L. The how and why of Modeling to Learn: Participatory system dynamics to improve evidence-based addiction and mental health care [Internet]. Prevention Science and Methodology Group, Northwestern University; 2021. [cited 23 June 2023] Available from: <https://cepim.northwestern.edu/calendar-events/2021-10-12-zimmerman?rq=zimmerman>
43. Luke DA, Sarli CC, Suiter AM, Carothers BJ, Combs TB, Allen JL, et al. The translational science benefits model: a new framework for assessing the health and societal benefits of clinical and translational sciences. *Clinical and translational science*. 2018;11(1):77–84.
44. Purtle J, Lê-Scherban F, Wang X, Shattuck PT, Proctor EK, Brownson RC. Audience segmentation to disseminate behavioral health evidence to legislators: An empirical clustering analysis. *Implementation Science*. 2018;13(1):1–13.
45. Weiss CH. The many meanings of research utilization. *Public administration review*. 1979;39(5):426–31.
46. Mohr DC, Cheung K, Schueller SM, Brown CH, Duan N. Continuous Evaluation of Evolving Behavioral Intervention Technologies. *American Journal of Preventive Medicine*. 2013;45(4):517–23.
47. Damschroder LJ, Reardon CM, Opra Widerquist MA, Lowery J. Conceptualizing outcomes for use with the Consolidated Framework for Implementation Research (CFIR): the CFIR Outcomes Addendum. *Implementation Science*. 2022 Jan 22;17(1):7.
