# Supplementary figures and images for: Leveraging group model building to operationalize implementation strategies across implementation phases: an exemplar related to child maltreatment intervention selection
Source: PubMed Central journal article supplement — Implement Sci Commun. 2024 Dec 2;5:134. doi: 10.1186/s43058-024-00660-2 (PMC11610114; doi:10.1186/s43058-024-00660-2), 2024-12-02

## Additional File 5: Partner-Defined Child Maltreatment Prevention Framework

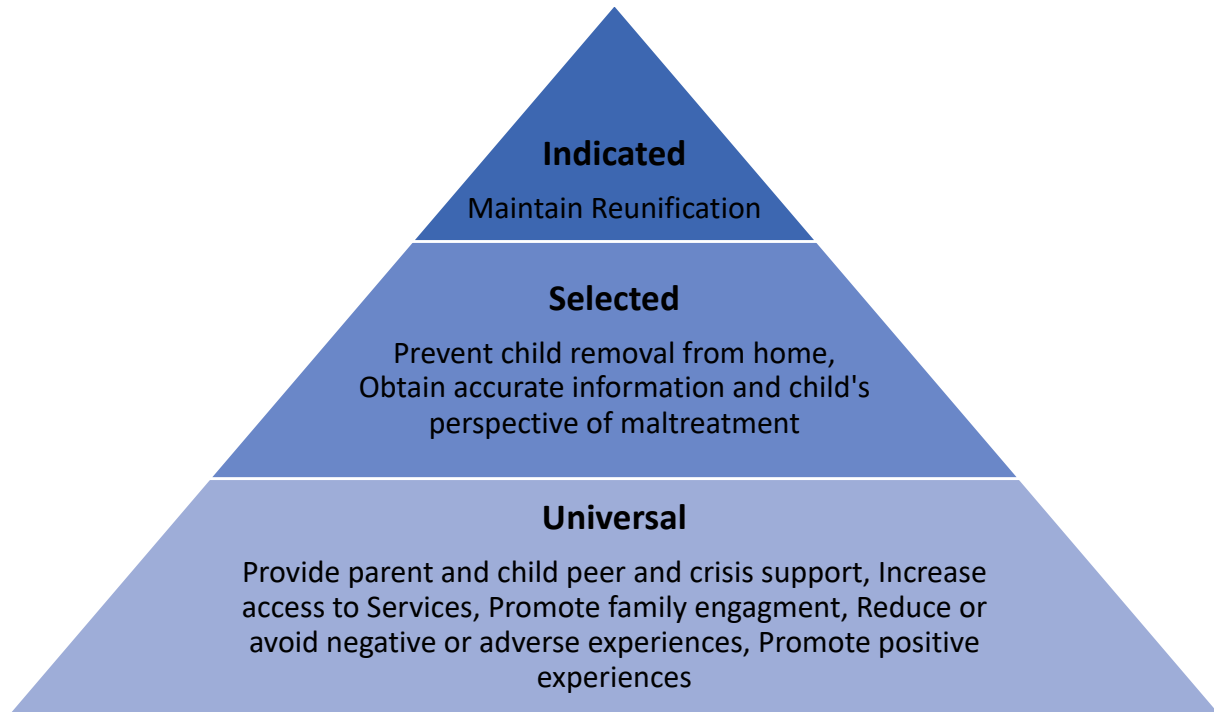

Supplement: 43058_2024_660_MOESM5_ESM.pdf [file 43058_2024_660_MOESM5_ESM.pdf]
